# Supplementary material for: Photocatalytic redox on the surface of colloidal silver nanoparticles revealed by second harmonic generation and two-photon luminescence
Source: Royal Society of Chemistry journal article supplement (doi:10.1039/d1cp02722k), 2021-01-01
Supplement: d1cp02722k1.pdf [file d1cp02722k1.pdf]

## Supporting information

### Photocatalytic Redox on the Surface of Colloidal Silver Nanoparticles Revealed by Second Harmonic Generation and Two Photon Luminescence

*Shan Xue<sup>a</sup>, Shun-li Chen<sup>b</sup>, Qing Ling<sup>a</sup>, Qunhui Yuan<sup>c</sup>, Wei Gan<sup>a,\*</sup>*

<sup>a</sup> Shenzhen Key Laboratory of Flexible Printed Electronics Technology, also School of Science, Harbin Institute of Technology (Shenzhen), University Town, Shenzhen 518055, Guangdong; School of Chemistry and Chemical Engineering, Harbin Institute of Technology, Harbin 150001, Heilongjiang, China  
E-mail: ganwei@hit.edu.cn

<sup>b</sup> Department of Chemistry and Key Laboratory for Preparation and Application of Ordered Structure Materials of Guangdong Province, Shantou University, Shantou 515063, Guangdong, China.

<sup>c</sup> Shenzhen Key Laboratory of Flexible Printed Electronics Technology, also School of Materials Science and Engineering, Harbin Institute of Technology (Shenzhen), University Town, Shenzhen 518055, Guangdong, China

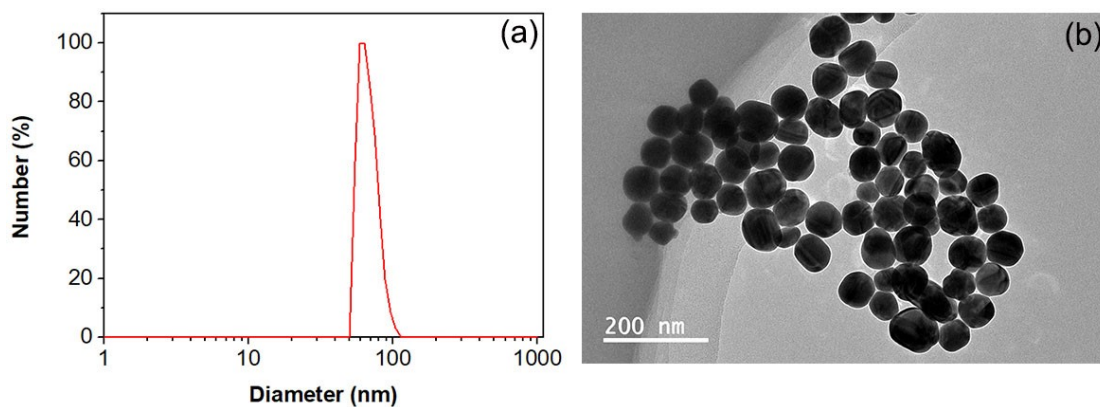

Figure S1. (a) The number distribution of AgNPs at different sizes obtained by DLS measurement. (b) TEM image of the AgNPs.

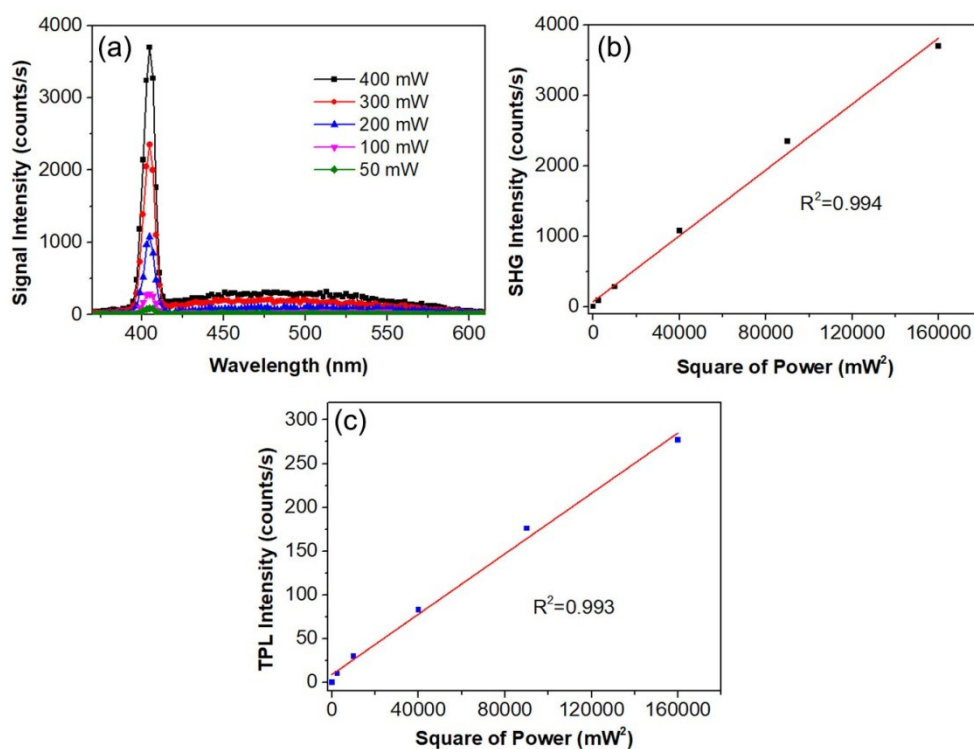

Figure S2. (a) Laser power dependence of the SHG and TPL signals with the SHG and TPF signals leveled off after the experiments shown in Figure 3 (with 300 mW laser power). (b/c) Linear relationship between the SHG/TPL intensities and the square of the laser power. The red curves in (b) and (c) are from linear fitting. This evidence proved the observed signals were second order contributions at both the relatively low and high laser powers, with no higher order contributions.

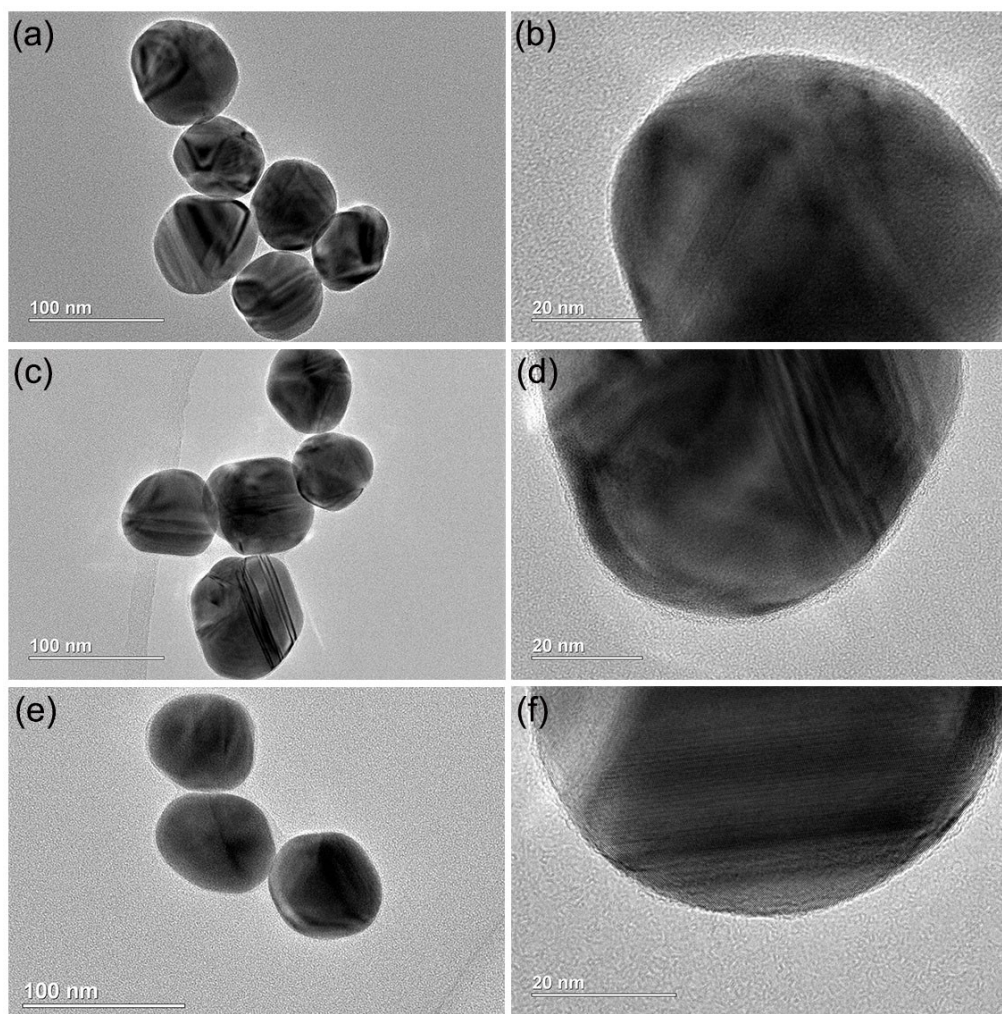

Figure S3. High-resolution TEM images of the AgNPs before and after laser irradiation. (a) (b) AgNPs before laser irradiation. (c) (d) AgNPs after laser irradiation at 100 mW for  $\sim 1$  h. (e) (f) AgNPs after laser irradiation at 700 mW for  $\sim 3$  h.

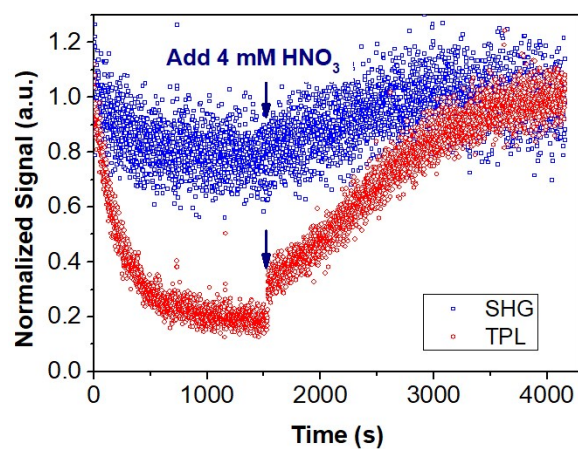

Figure S4. The time-dependent SHG and TPL signals of AgNPs colloids before and after the addition of 4 mM HNO<sub>3</sub> under irradiation by 810 nm laser with power of 100 mW.

Table S1. The Number mean diameter of the AgNPs under excitation of 810 nm laser with different powers for ~ 40 min.

| <b>Power (mW)</b>                 | 0        | 50       | 100      | 200      | 300      | 500      | 700      |
|-----------------------------------|----------|----------|----------|----------|----------|----------|----------|
| <b>Diameter by<br/>Number(nm)</b> | 67.9±3.9 | 69.9±2.4 | 67.5±2.3 | 64.4±2.7 | 64.5±4.9 | 65.2±4.8 | 67.1±2.3 |
